# Supplementary material for: Evolution and extinction can occur rapidly: a modeling approach
Source: PeerJ. 2021 Apr 13;9:e11130. doi: 10.7717/peerj.11130 (PMC8051336; doi:10.7717/peerj.11130)
Supplement: Supplemental Information 1 [file peerj-09-11130-s001.docx]

PUNCTUATED EQUILIBRIUM EVOLUTION: MATHEMATICAL MODEL

Vitaly A. Likhoshvai, Tamara M. Khlebodarova

Supplementary Information

**S1. Derivation of the evolutionary model of a transitive population.**

We have the following evolutionary model of a transitive population (see the main text of the article):

where *x*(*t*) is the density of transitive individuals and W and Y are the laws of self-production and mortality, respectively, which are determined based on the following equations:

where C and D are the maximum possible biota density and the rate of degradation of transitive individuals, determined by the internal laws of ecosystem functioning, respectively. Since , partial derivatives with respect to the parameters C and D have the following form:

where

Thus, time derivative of the adaptability functional equals:

Define as follows:

As a result, we obtain an ordinary differential equation:

Let us find a particular solution to this equation in the form of a series

Derive *Z*.

As a result, we received a particular solution in the form of a series.

General system has the form

A more convenient form of the system describing the evolution of a transitive population:
